# Supplementary material for: Characterizing the Proliferation Patterns of Representative Microsporidian Species Enlightens Future Studies of Infection Mechanisms
Source: MDPI journal article supplement (doi:10.3390/pathogens11111352), 2022-11-15
Supplement: s1 [file s1]

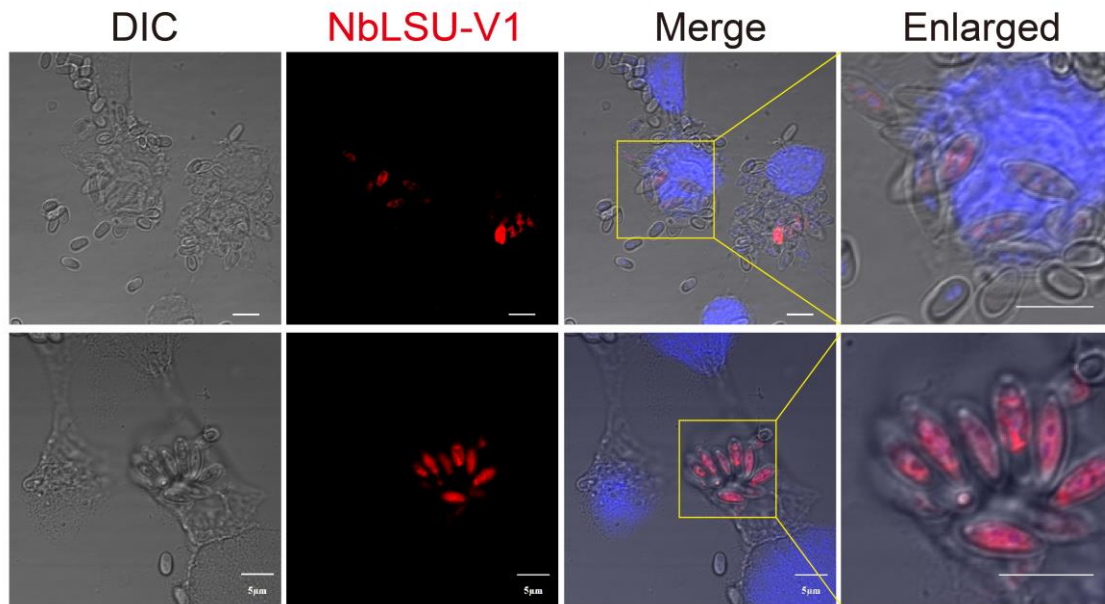

**Figure S1.** *N. bombycis* sporoblasts at 48 hpi. Laser confocal microscopy showing a nucleus labeled with DAPI (blue). The pathogens were labeled with the FISH probe (red). Scale bar, 5  $\mu$ m.
